# Supplementary material
Source: publisher figshare collection journal article supplement (https://acs.figshare.com/ndownloader/files/22454174)
Supplement: Supplementary file 1 [file 22454174]

## Supporting Information

# Direct surface modification of graphitic C<sub>3</sub>N<sub>4</sub> with porous organic polymer and silver nanoparticles for promoting CO<sub>2</sub> conversion

*Cheng Du,<sup>†</sup> Xingwang Lan,<sup>\*†‡</sup> Guangyu An,<sup>†</sup> Qing Li,<sup>†</sup> & Guoyi Bai<sup>\*†</sup>*

<sup>†</sup>Key Laboratory of Chemical Biology of Hebei Province, College of Chemistry and Environmental Science, Hebei University, Wusi East Road 180, Baoding, Hebei, 071002, P.R.China.

<sup>‡</sup> Key Laboratory for Green Chemical Technology of Ministry of Education, School of Chemical Engineering and Technology Collaborative Innovation Center of Chemical Science and Engineering, Tianjin University, Weijin Road 92, Tianjin, 300072, P.R.China.

\*Corresponding Author:

E-mail address: hxlxw@sina.cn (Xingwang Lan)

baiguoyi@hotmail.com (Guoyi Bai)

Total number of pages: 17

Total number of figures: 27

Total number of tables: 1

## 1. Segmental figures and tables

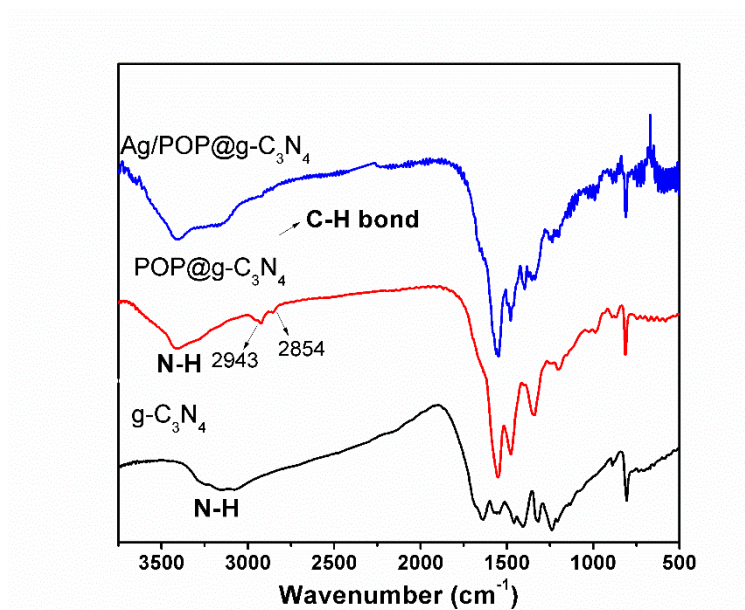

Figure S1. FT-IR spectra of  $\text{g-C}_3\text{N}_4$ ,  $\text{POP@g-C}_3\text{N}_4$  and  $\text{Ag/POP@g-C}_3\text{N}_4$ .

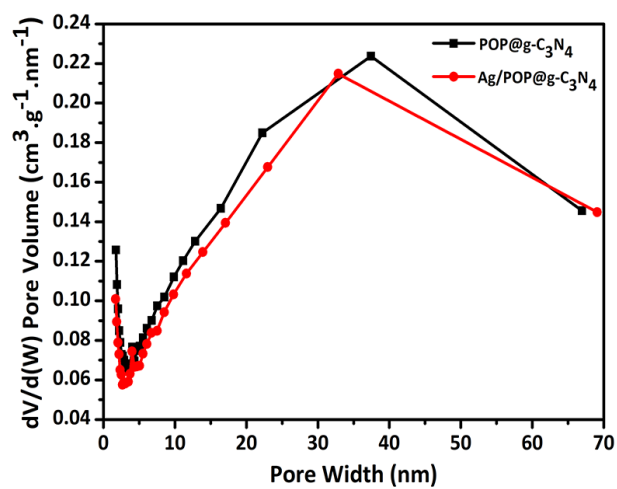

Figure S2. Pore size distributions of  $\text{POP@g-C}_3\text{N}_4$  and  $\text{Ag/POP@g-C}_3\text{N}_4$ .

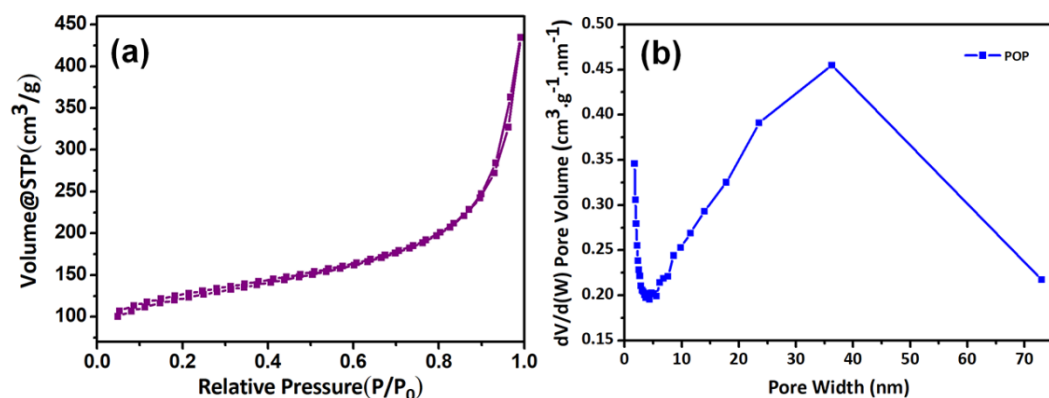

**Figure S3.** (a) N<sub>2</sub> adsorption-desorption isotherms of POP. (b) Pore size distributions of POP.

**Table S1. Physicochemical properties of the catalyst**

| Sample                                 | $S_{\text{BET}}^{\text{a}}$ (m <sup>2</sup> /g) | $V_{\text{t}}^{\text{b}}$ (cm <sup>3</sup> /g) | $V_{\text{micro}}^{\text{c}}$ (cm <sup>3</sup> /g) | $V_{\text{meso}}^{\text{d}}$ (cm <sup>3</sup> /g) |
|----------------------------------------|-------------------------------------------------|------------------------------------------------|----------------------------------------------------|---------------------------------------------------|
| g-C <sub>3</sub> N <sub>4</sub>        | 1.54                                            | 0.0326                                         | 0.00641                                            | 0.0326                                            |
| POP                                    | 408.63                                          | 0.672                                          | 0.0794                                             | 0.620                                             |
| POP@g-C <sub>3</sub> N <sub>4</sub>    | 110.54                                          | 0.286                                          | 0.00873                                            | 0.287                                             |
| Ag/POP@g-C <sub>3</sub> N <sub>4</sub> | 98.55                                           | 0.269                                          | 0.00722                                            | 0.265                                             |

<sup>a</sup>  $S_{\text{BET}}$ : BET surface areas. <sup>b</sup>  $V_{\text{t}}$ : total pore volume at  $P/P_0 = 0.99$ . <sup>c</sup>  $V_{\text{micro}}$ : micropore volume, calculated by HK method. <sup>d</sup>  $V_{\text{meso}}$ : mesopore volume.

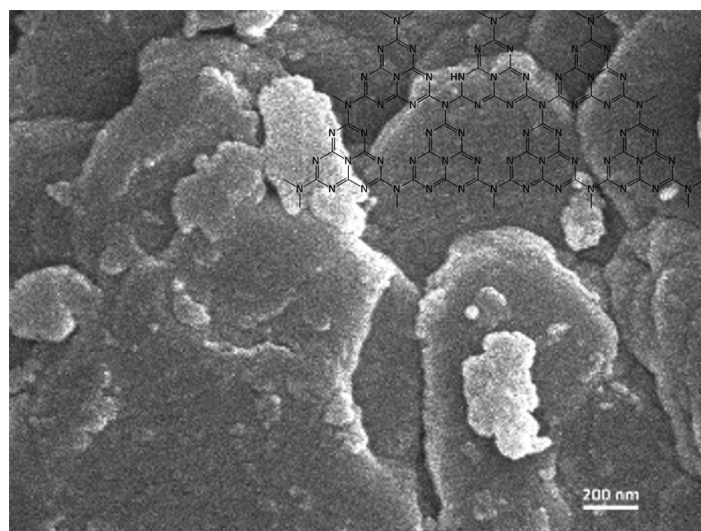

**Figure S4.** SEM image of g-C<sub>3</sub>N<sub>4</sub>.

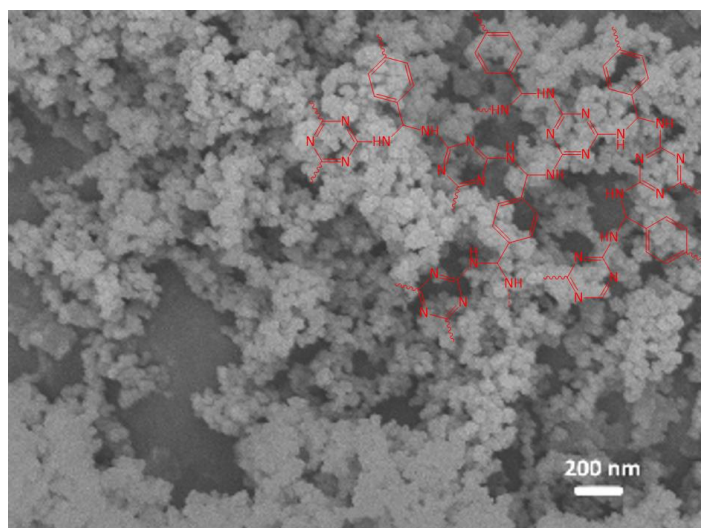

**Figure S5.** SEM image of POP.

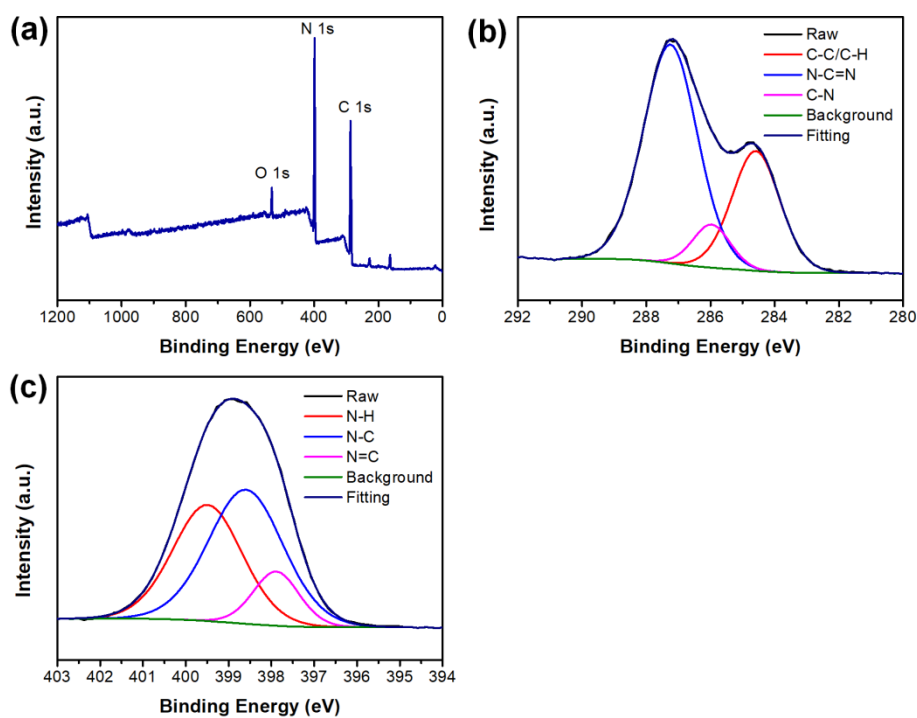

**Figure S6.** XPS spectra of POP@g-C<sub>3</sub>N<sub>4</sub>. (a) Survey spectrum, (b) C 1s, and (c) N 1s high-resolution spectra.

## 2. NMR and GC-MS data

*4,4-dimethyl-5-methylene-1,3-dioxolan-2-one (1a):*

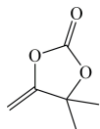

Colorless oil liquid.  $^1\text{H}$  NMR (400 MHz,  $\text{CDCl}_3$ )  $\delta$  (ppm): 4.77 (d,  $J = 4.00$  Hz, 1H), 4.31 (d,  $J = 4.00$  Hz, 1H), 1.61 (s, 6H).  $^{13}\text{C}$  NMR (100 MHz,  $\text{CDCl}_3$ )  $\delta$  (ppm): 158.73, 151.27, 85.29, 84.83, 27.57. GC-MS calcd. for  $\text{C}_6\text{H}_8\text{O}_3$  128.05, found 128.10.

*4-ethyl-4-methyl-5-methylene-1,3-dioxolan-2-one (1b):*

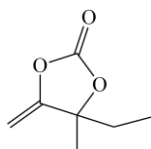

Colorless oil liquid.  $^1\text{H}$  NMR (400 MHz,  $\text{CDCl}_3$ )  $\delta$  (ppm): 4.82 (d,  $J = 4.00$  Hz, 1H), 4.26 (d,  $J = 4.00$  Hz, 1H), 1.96-1.87 (m, 1H), 1.80-1.71 (m, 1H), 1.58 (s, 3H), 1.00-0.97 (m, 3H).  $^{13}\text{C}$  NMR (100 MHz,  $\text{CDCl}_3$ )  $\delta$  (ppm): 157.44, 151.57, 87.58, 85.57, 33.41, 25.99, 7.35. GC-MS calcd. for  $\text{C}_7\text{H}_{10}\text{O}_3$  142.06, found 142.08.

*4,4-dieethyl-5-methylene-1,3-dioxolan-2-one (1c):*

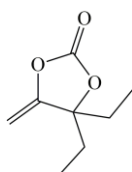

Colorless oil liquid.  $^1\text{H}$  NMR (400 MHz,  $\text{CDCl}_3$ )  $\delta$  (ppm): 4.86 (d,  $J = 4.00$  Hz, 1H), 4.23 (d,  $J = 4.00$  Hz, 1H), 1.97-1.88 (m, 2H), 1.75-1.64 (m, 2H), 0.99- 0.95 (m, 6H).  $^{13}\text{C}$  NMR (100 MHz,  $\text{CDCl}_3$ )  $\delta$  (ppm): 155.78, 151.89, 90.86, 85.82, 31.90, 7.11. GC-MS calcd. for  $\text{C}_8\text{H}_{12}\text{O}_3$  156.08, found 156.07.

*4-isobutyl-4-methyl-5-methylene-1,3-dioxolan-2-one (1d):*

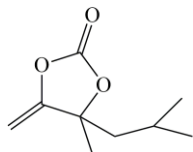

Colorless oil liquid.  $^1\text{H}$  NMR (400 MHz,  $\text{CDCl}_3$ )  $\delta$  (ppm): 4.79 (d,  $J = 4.00$  Hz, 1H), 4.27 (d,  $J = 4.00$  Hz, 1H), 1.88-1.77 (m, 2H), 1.69-1.61 (s, 1H), 1.57 (s, 3H), 0.97-0.95 (m, 6H).  $^{13}\text{C}$  NMR (100 MHz,  $\text{CDCl}_3$ )  $\delta$  (ppm): 158.31, 151.49, 87.34, 85.59, 48.52, 27.01, 24.28, 23.98, 23.67. GC-MS calcd. for  $\text{C}_8\text{H}_{12}\text{O}_3$  170.21, found 170.16.

*4-methylene-1,3-dioxaspiro[4.4]nonan-2-one (1e):*

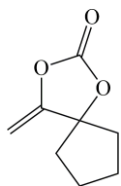

Colorless oil liquid.  $^1\text{H}$  NMR (400 MHz,  $\text{CDCl}_3$ )  $\delta$  (ppm): 4.78 (d,  $J = 4.00$  Hz, 1H), 4.33 (d,  $J = 4.00$  Hz, 1H), 2.28-2.19 (m, 2H), 1.98-1.77 (m, 6H).  $^{13}\text{C}$  NMR (100 MHz,  $\text{CDCl}_3$ )  $\delta$  (ppm): 157.75, 151.51, 94.23, 85.34, 40.65, 24.25. GC-MS calcd. For  $\text{C}_8\text{H}_{10}\text{O}_3$  154.06, found 154.03.

*4-methylene-1,3-dioxaspiro [4.5]decan-2-one (1f):*

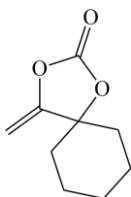

Colorless oil liquid.  $^1\text{H}$  NMR (400 MHz,  $\text{CDCl}_3$ )  $\delta$  (ppm): 4.76 (d,  $J = 4.00$  Hz, 1H), 4.28 (d,  $J = 4.00$  Hz, 1H), 2.02-1.98 (d, 2H), 1.72-1.61 (m, 7H), 1.36-1.25 (m, 1H).  $^{13}\text{C}$  NMR (100 MHz,  $\text{CDCl}_3$ )  $\delta$  (ppm): 158.74, 151.50, 86.40, 85.49, 36.51, 24.35, 21.61. GC-MS calcd. for  $\text{C}_9\text{H}_{12}\text{O}_3$  168.08, found 168.06.

*4-methyl-5-methylene-4-nonyl-1,3-dioxolan-2-one (1g):*

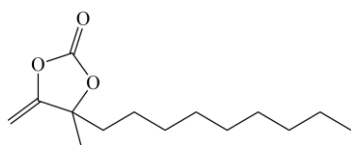

Colorless solid.  $^1\text{H}$  NMR (400 MHz,  $\text{CDCl}_3$ )  $\delta$  (ppm): 4.79 (d,  $J = 4.00$  Hz, 1H), 4.26 (d,  $J = 4.00$  Hz, 1H), 1.85 (m, 1H), 1.68 (m, 1H), 1.57 (s, 3H), 1.35-1.25 (m, 14H), 0.89-0.85 (m, 3H).  $^{13}\text{C}$  NMR (100 MHz,  $\text{CDCl}_3$ )  $\delta$  (ppm): 157.75, 151.58, 87.28, 85.47, 40.42, 31.82, 29.41, 29.31, 29.26, 29.23, 26.32, 22.93, 22.85, 14.09. GC-MS calcd. for  $\text{C}_{14}\text{H}_{24}\text{O}_3$  240.17, found 240.10.

### 3. Copies of NMR and GC-MS spectra of all products

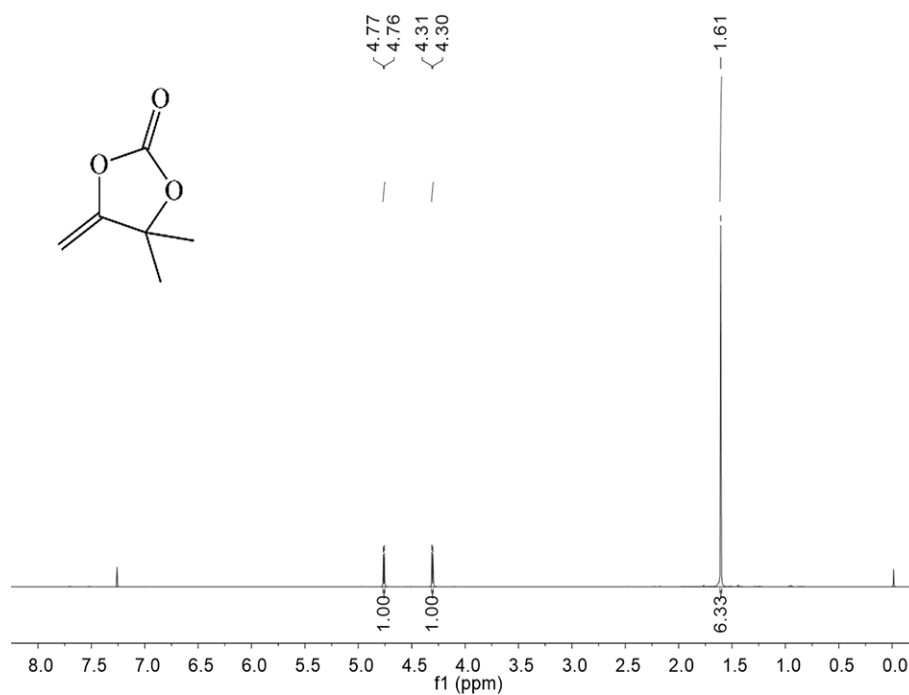

**Figure S7.** <sup>1</sup>H NMR spectrum of product *1a*

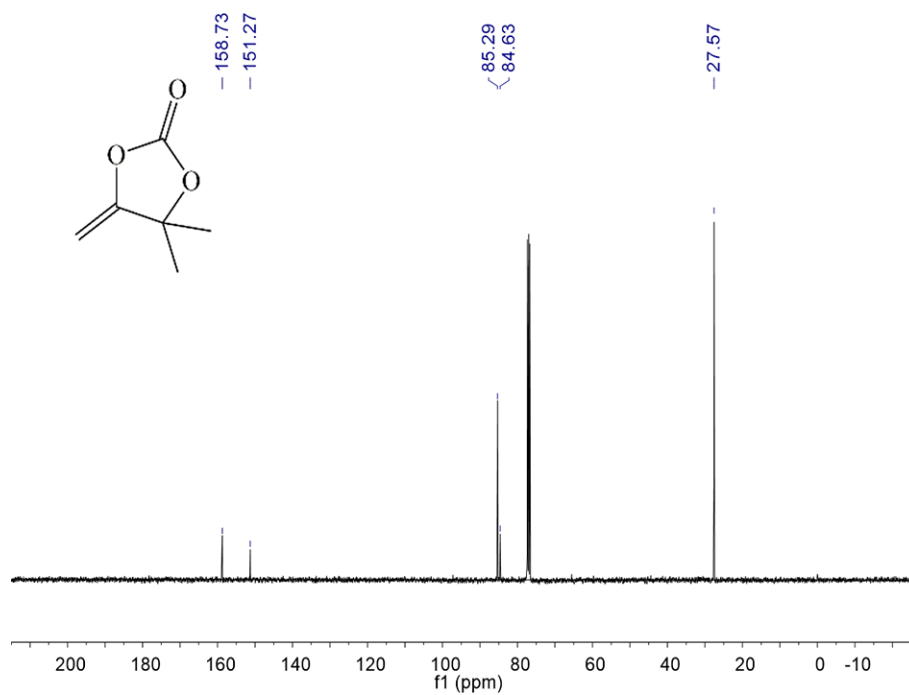

**Figure S8.** <sup>13</sup>C NMR spectrum of product *1a*

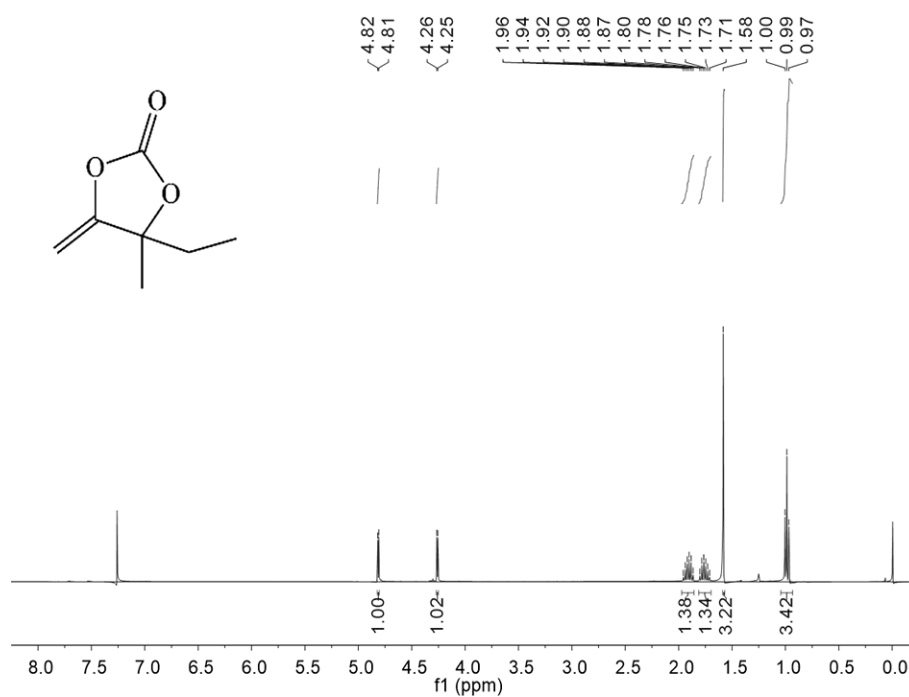

**Figure S9.** <sup>1</sup>H NMR spectrum of product *1b*

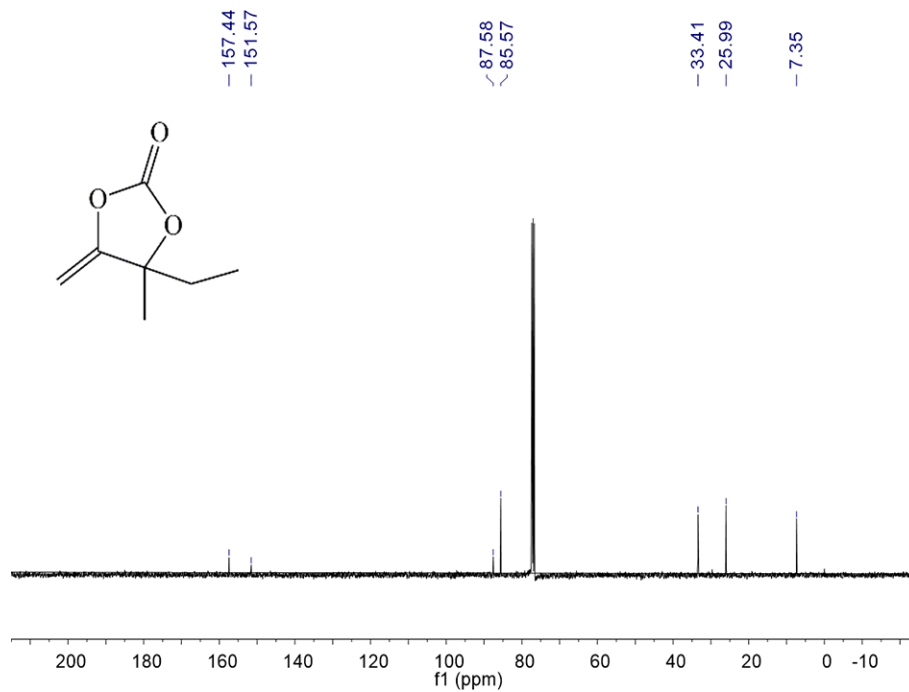

**Figure S10.** <sup>13</sup>C NMR spectrum of product *1b*



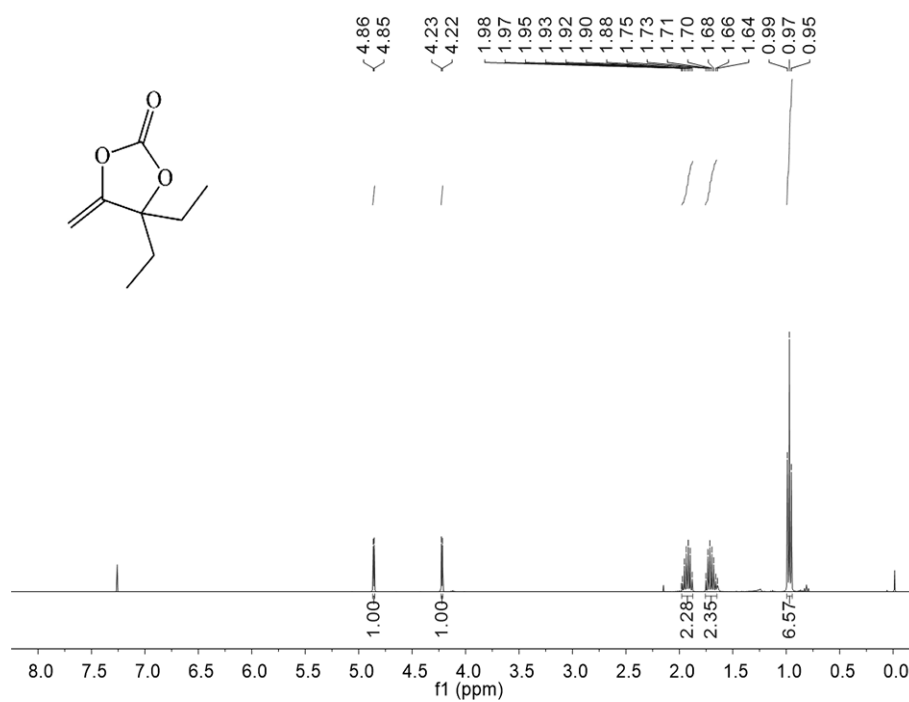

**Figure S11.** <sup>1</sup>H NMR spectrum of product *1c*

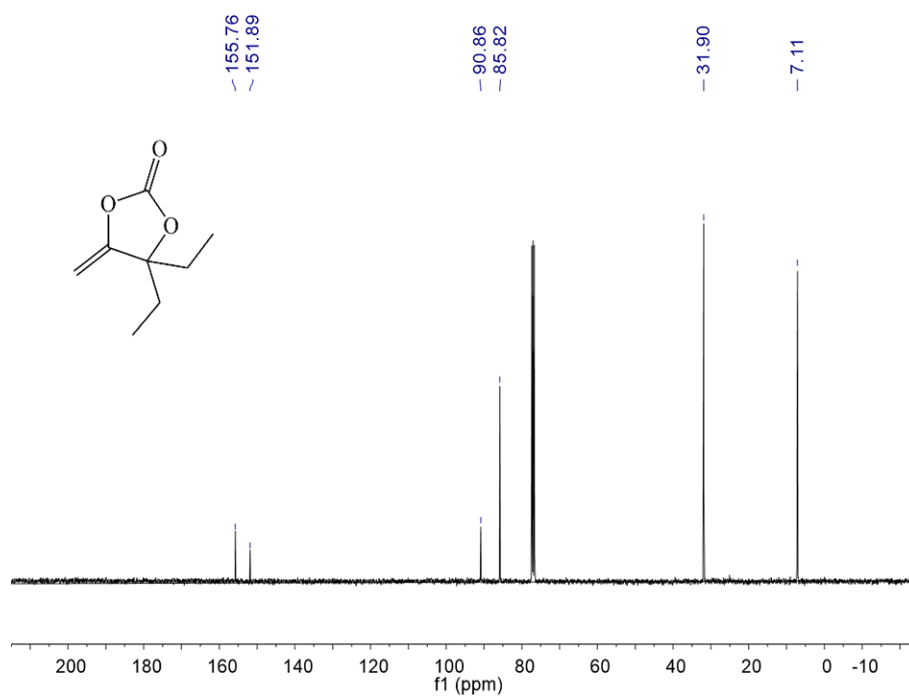

**Figure S12.** <sup>13</sup>C NMR spectrum of product *1c*

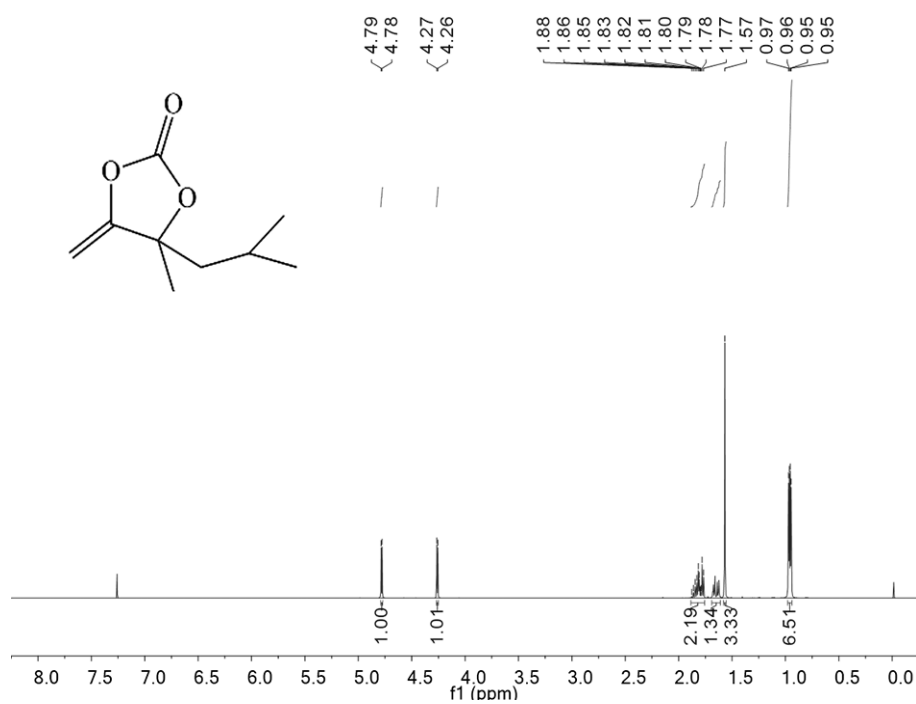

**Figure S13.**  $^1\text{H}$  NMR spectrum of product *1d*

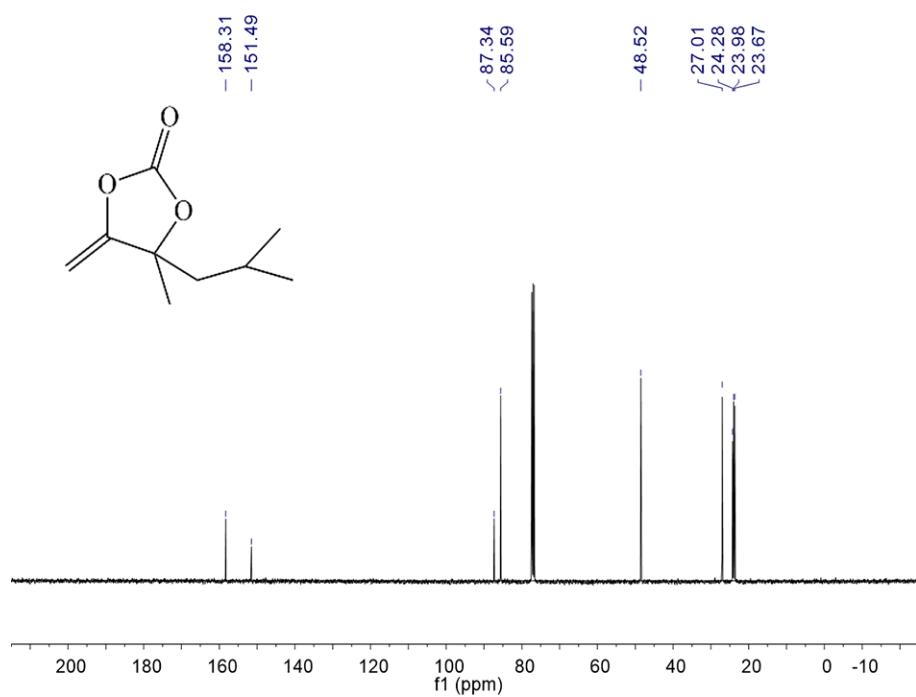

**Figure S14.**  $^{13}\text{C}$  NMR spectrum of product *1d*

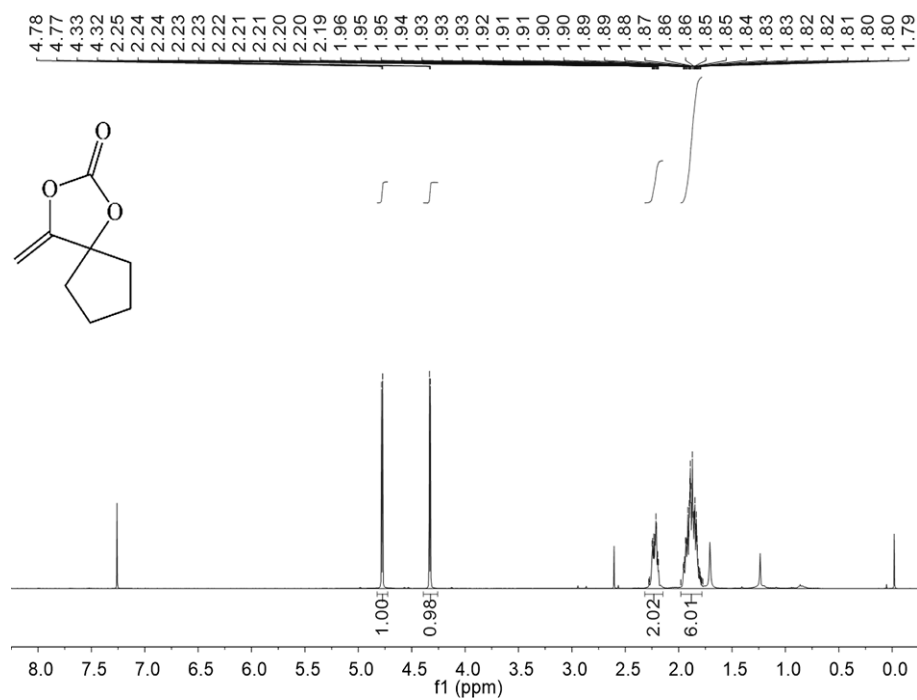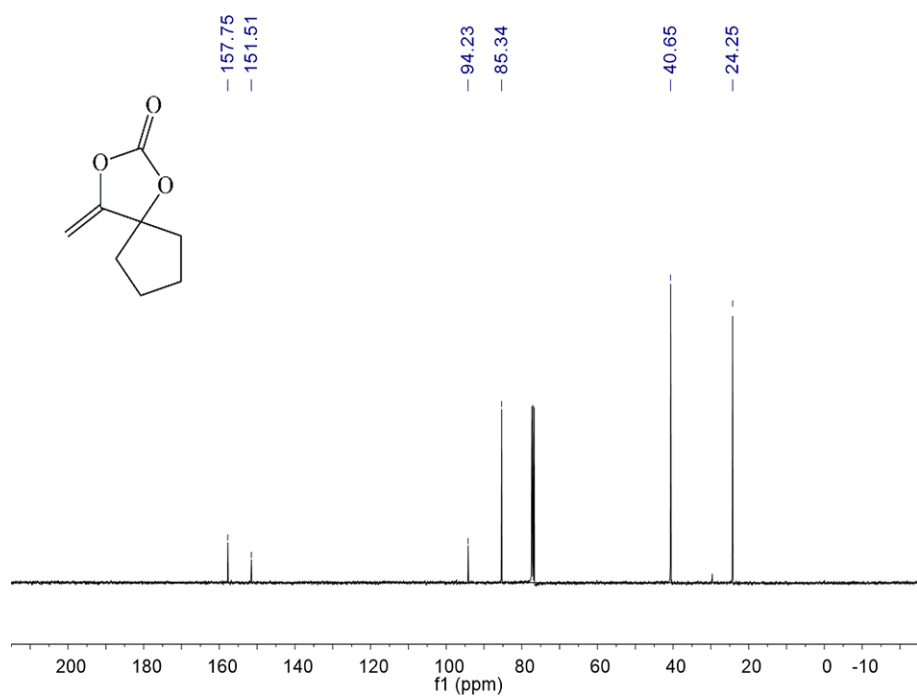

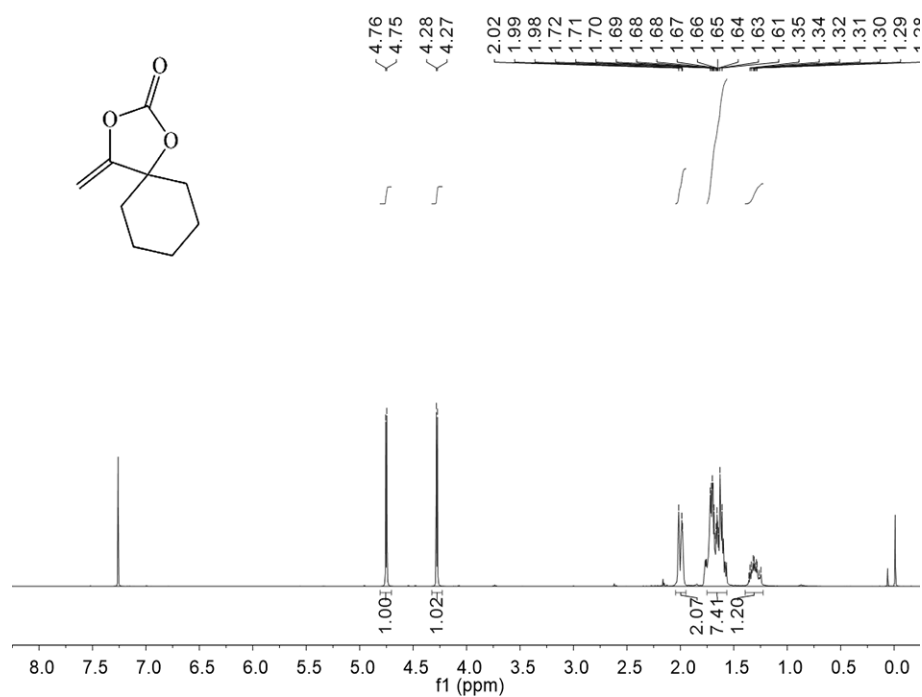

**Figure S17.** <sup>1</sup>H NMR spectrum of product *If*

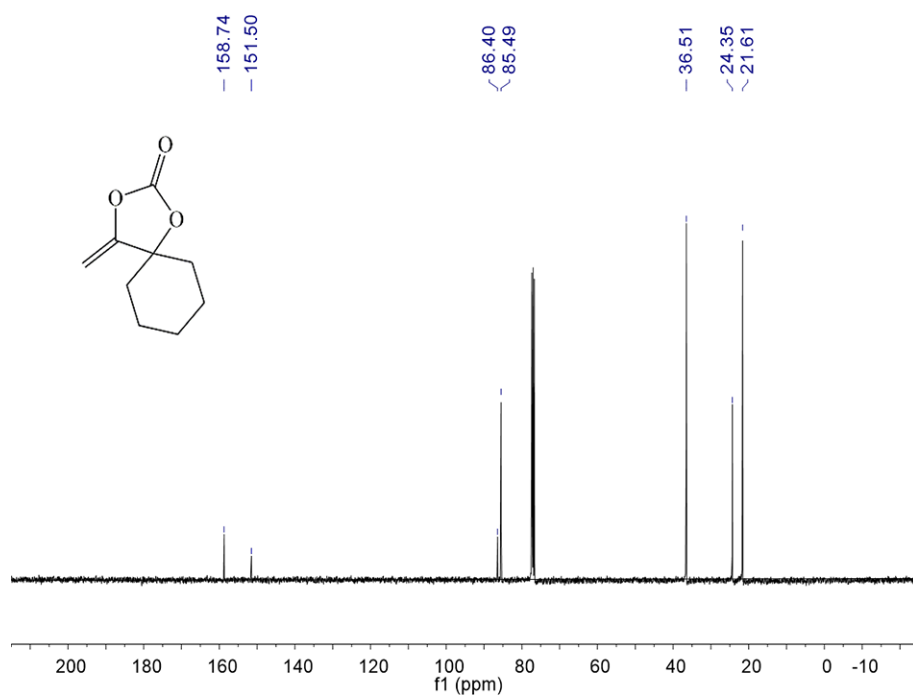

**Figure S18.** <sup>13</sup>C NMR spectrum of product *If*

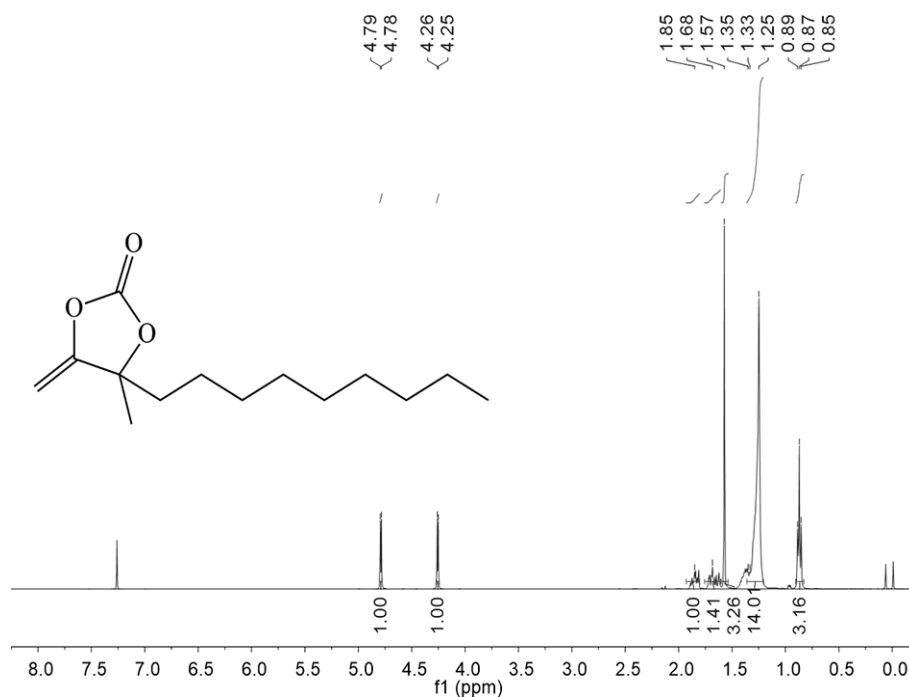

**Figure S19.** <sup>1</sup>H NMR spectrum of product *Ig*

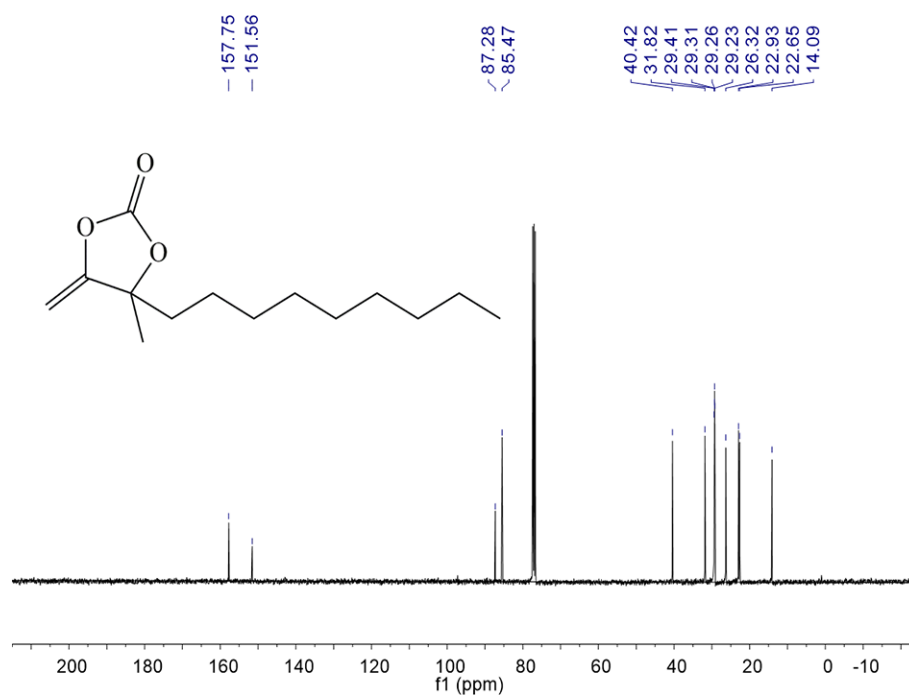

**Figure S20.** <sup>13</sup>C NMR spectrum of product *Ig*

**Copies of MS Spectra of All Products**

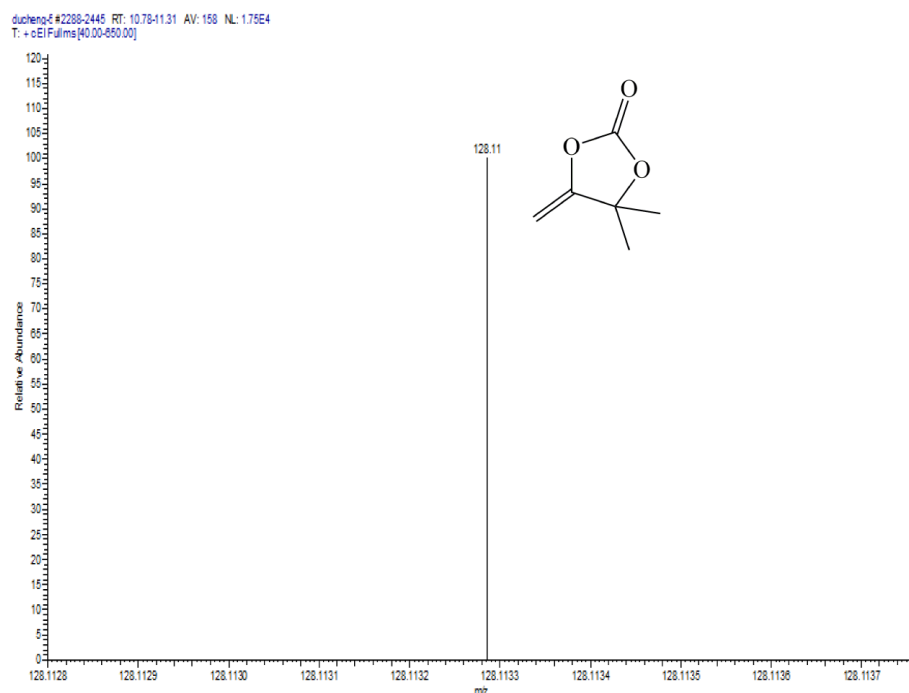

**Figure S21.** MS spectrum of product *1a*

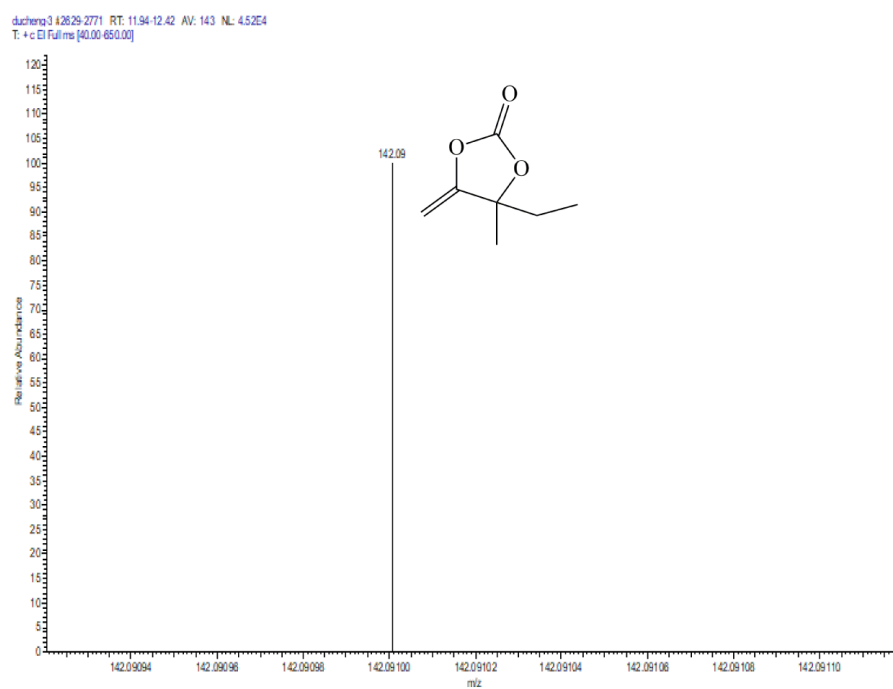

**Figure S22.** MS spectrum of product *1b*

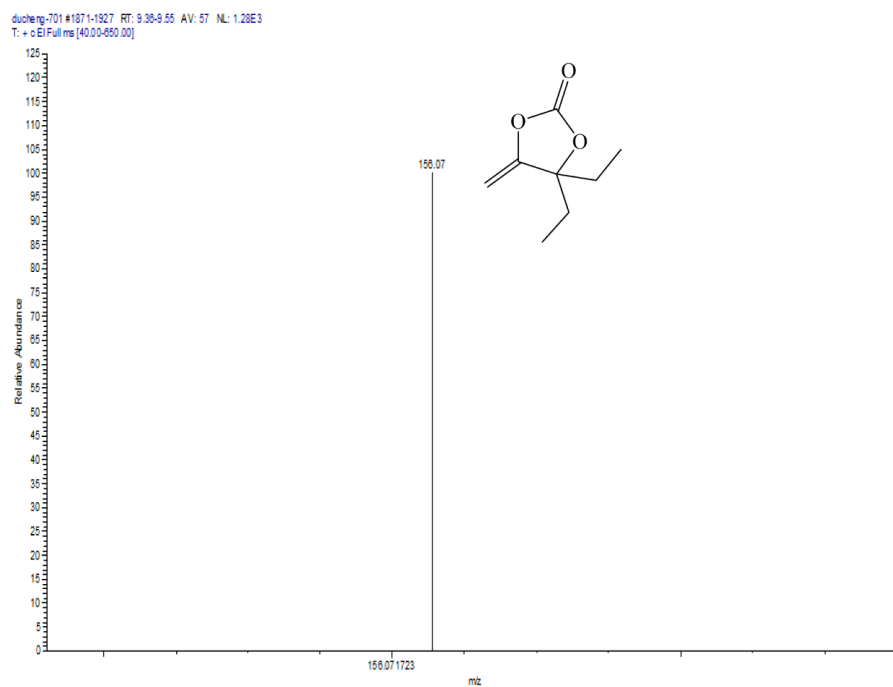

**Figure S23.** MS spectrum of product *1c*

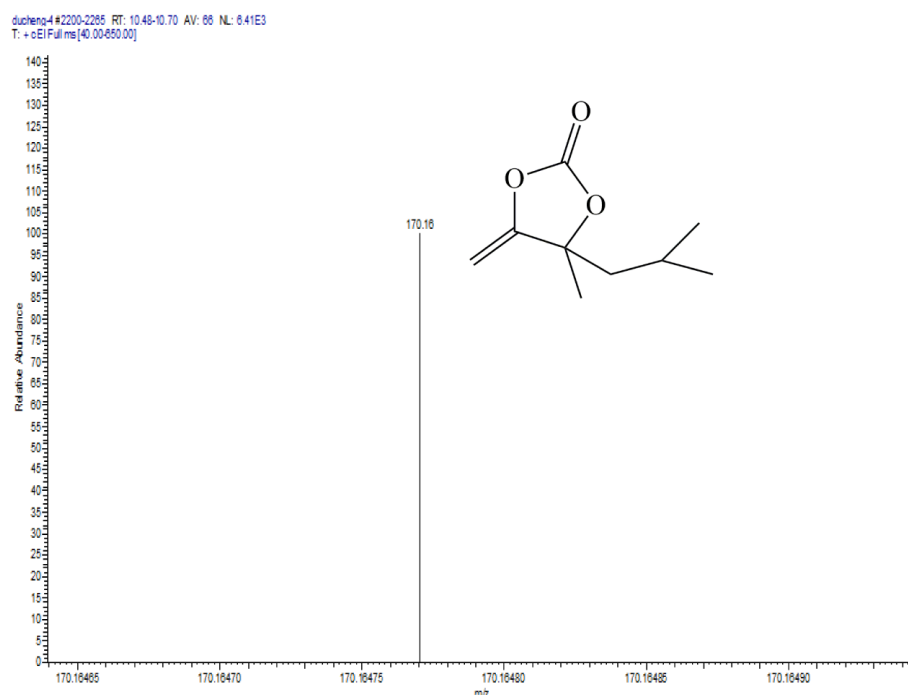

**Figure S24.** MS spectrum of product *1d*

ducheno-1 #2357-2430 RT: 11.01-11.26 AV: 74 NL: 8.87E5  
T: + e EI Full ms [40.00-650.00]

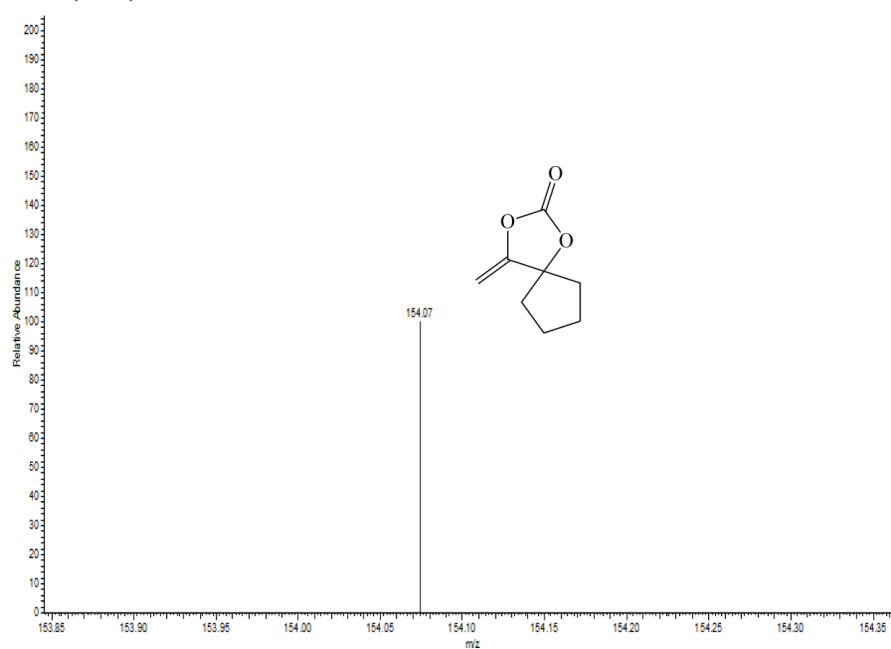

**Figure S25.** MS spectrum of product *1e*

achemo-2 #2582-2645 RT: 11.71-11.99 AV: 94 NL: 1.54E5  
+ e EI Full ms [40.00-650.00]

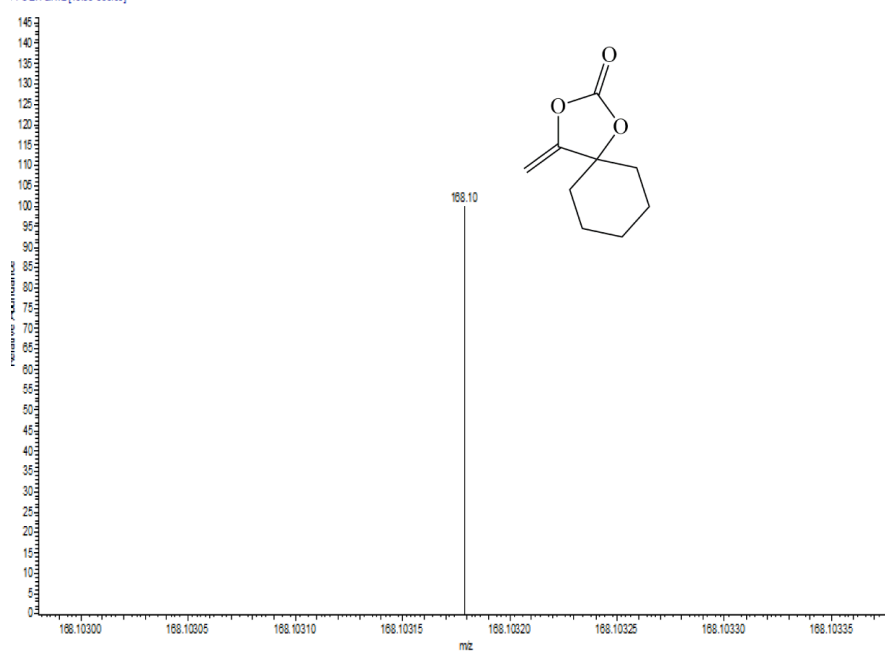

**Figure S26.** MS spectrum of product *1f*



duchong-#3079-3143 RT: 13.47-13.69 AV: 65 NL: 488E3  
T: • cEI Full ms [40.00-650.00]

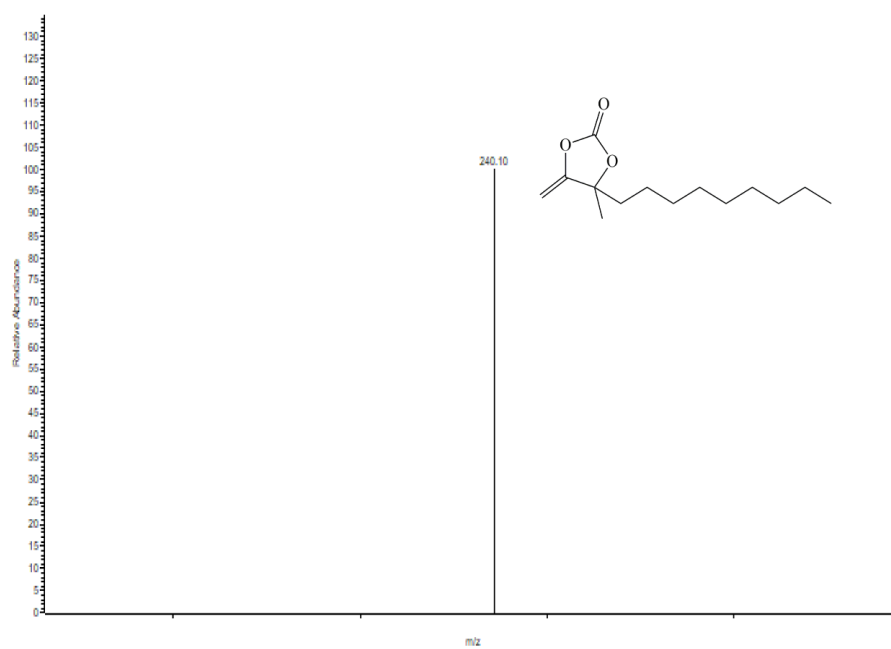

**Figure S27.** MS spectrum of product *1g*
